# Supplementary material
Source: PubMed Central journal article supplement (PMC3532712)

**Portal****Central****CL**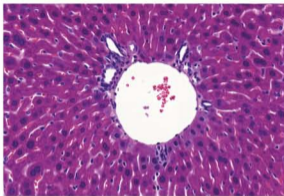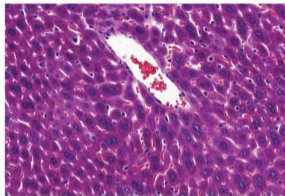**GF**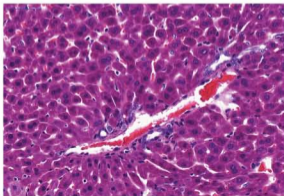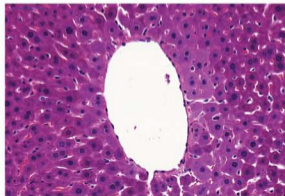**Nucleated Sinusoidal  
Cells/HPF**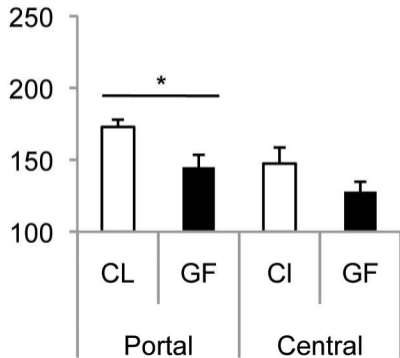

Supplement: mmc1.pdf [file mmc1.pdf]

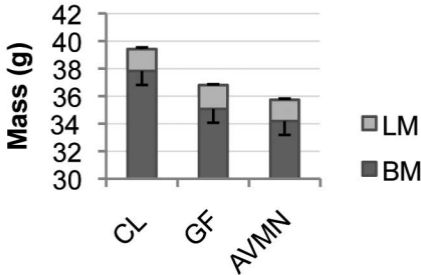

Supplement: mmc4.pdf [file mmc4.pdf]

**Portal****Central****CL**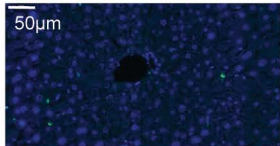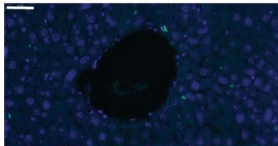**GF**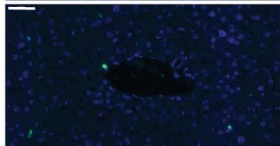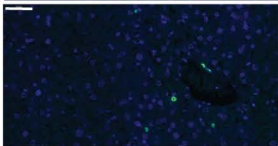**AVMN**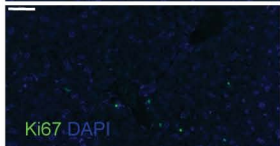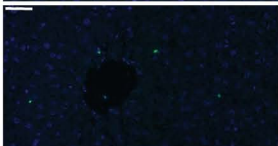

HEPATOCYTE

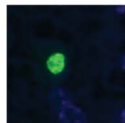

SINUSOID

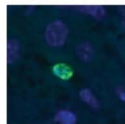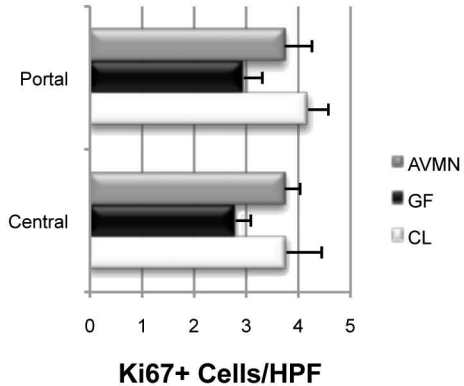

Supplement: mmc5.pdf [file mmc5.pdf]

**CD80**

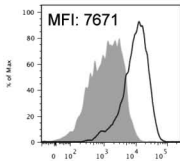

**CD86**

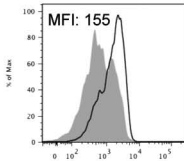

**CD80**

**CL**

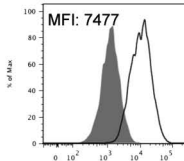

**CD86**

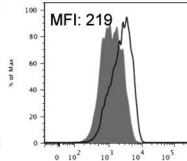

**GF**

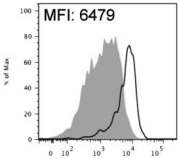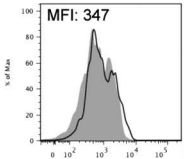

**AVMN**

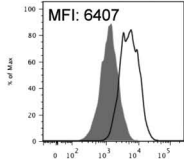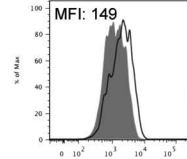

Supplement: mmc6.pdf [file mmc6.pdf]

## CD80

## CD86

**CL**

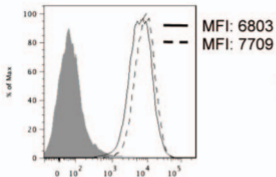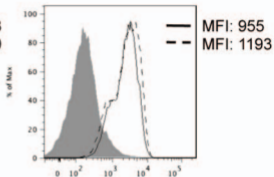

**GF**

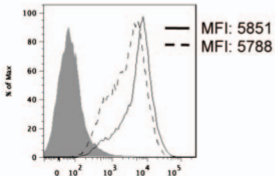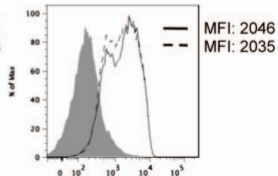

Supplement: mmc7.pdf [file mmc7.pdf]
